# Supplementary material for: Wilms Tumor 1 Mutations Are Independent Poor Prognostic Factors in Pediatric Acute Myeloid Leukemia
Source: PubMed Central journal article supplement (PMC8096913; doi:10.3389/fonc.2021.632094), 2021-04-21
Supplement: DataSheet_1.pdf [file DataSheet_1.pdf]

*Supplementary Material*

Supplementary Figures

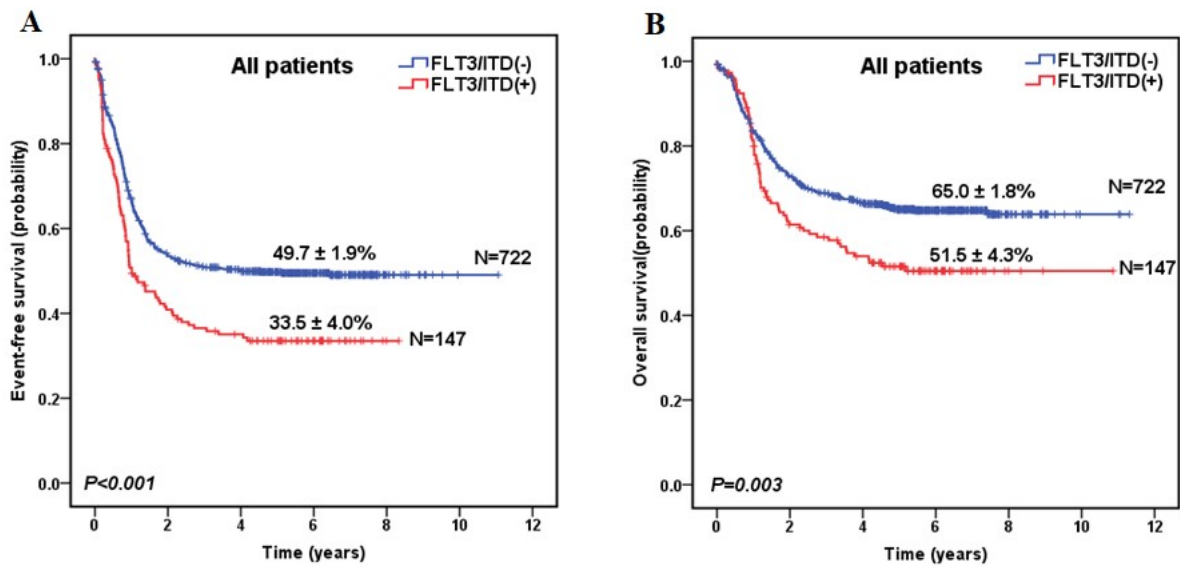

**Supplementary Figure 1. Survival curves of pediatric AML patients according to the *FLT3/ITD* status.** Probability of EFS (A) and OS (B) for patients according to *FLT3/ITD* status, respectively.

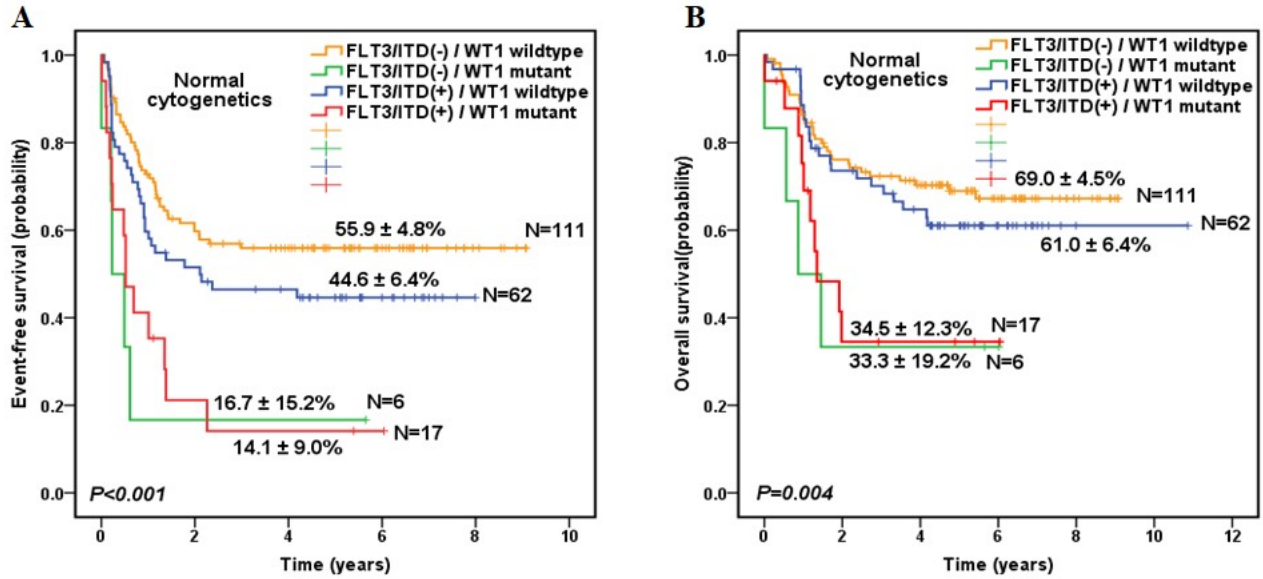

**Supplementary Figure 2. Survival curves of the subgroup of cytogenetically normal AML patients according to the combined *WT1* and *FLT3/ITD* status.** Probability of EFS (A) and OS (B) for patients according to the combined *WT1* and *FLT3/ITD* status, respectively.
